# Supplementary material
Source: Springer Nature journal article supplement (https://www.springermedizin.de/resource/supplementary/13017_2009_127_MOESM6_ESM.pdf/9635538)
Supplement: MOESM6 [file 9635538]

TABLE 1: Summary Data

| Patient # | Age/Sex | Nuclear Medicine<br>Source of Bleeding | Transfusion<br>Requirement (Packed<br>Red Cells Units) | Hgb level prior<br>to transfusion<br>g/dl | Time between marker<br>placement and angiography | Angiographically<br>positive    | Hemostasis<br>after<br>embolization | Etiology of bleeding               |
|-----------|---------|----------------------------------------|--------------------------------------------------------|-------------------------------------------|--------------------------------------------------|---------------------------------|-------------------------------------|------------------------------------|
| 1         | 70/M    | Hepatic Flexure of Colon               | 5                                                      | 11.4                                      | < 2 hours                                        | Yes                             | Yes                                 | Diverticulosis                     |
| 2         | 84/F    | Hepatic Flexure of Colon               | 5                                                      | 5.4                                       | < 2 hours                                        | No                              | Yes                                 | Suspected diverticulosis           |
| 3         | 65/F    | Splenic Flexure of Colon               | 5                                                      | 7                                         | < 2 hours                                        | No                              | Yes                                 | Unknown                            |
| 4         | 55/F    | Splenic Flexure of Colon               | 12                                                     | 7.9                                       | < 2 hours                                        | No                              | Yes                                 | Submucosal vascular ectasia        |
| 5         | 68/M    | Rectum                                 | 7                                                      | 11                                        | < 2 hours,<br>18 hours for 2nd intervention      | Yes, during<br>2nd intervention | Yes,<br>after 2nd intervention      | Rectal ulcer due to<br>rectal tube |
